# Supplementary material
Source: publisher site journal article supplement (https://www.dovepress.com/article/304439)
Supplement: Supplementary file 1 [file get_supplementary_file.php]

**Supplementary Table 1. Clinical characteristics of complete response (CR) patients.**

| No | Max tumor diameter (cm) | Tumor number | PVTT | Metastasis | AFP (ng/mL) | Sorafenib treatment (mo) | Death | Survival time (mo) | Concomitant treatment | Salvage treatment |
| --- | --- | --- | --- | --- | --- | --- | --- | --- | --- | --- |
| 1 | 4 | 3 | 0 |  | 6.2 | 12 | No | 85 |  |  |
| 2 | 2.2 | 1.0 | Vp3 |  | 402.8 | 26 | Yes | 29 |  |  |
| 3 | 8 | 1.0 | Vp4 |  | 4606.6 | 44 | No | 91 |  |  |
| 4 | 4.3 | 1 | Vp4 |  | 177.0 | 1 | Yes | 33 | TACE |  |
| 5 | 0 | 0 | 0 | Lung | 23.0 | 3 | Yes | 42 |  | Metasectomy |
| 6 | 0 | 0 | 0 | Lung | 13.0 | 47 | No | 76 |  |  |
| 7 | 3.6 | 2 | 0 |  | 805.1 | 38 | Yes | 46 | TACE |  |
| 8 | 5.0 | 2 | 0 |  | 97.9 | 5 | Yes | 41 | TACE |  |

**Supplementary Table 2. Clinical characteristics of partial remission (PR) patients.**

|  | Long term survivor (N=38) | Short term survivor (N=101) | P Value * |
| --- | --- | --- | --- |
| Child Pugh score |  |  | 0.180 |
| A | 31 (81.6) | 71 (70.3) |  |
| B | 7 (18.4) | 30 (29.7) |  |
| Maximum diameter  (cm) | 5.47 ± 4.67 | 6.33 ± 4.62 | 0.555 |
| Number of HCC  nodules | 2.70 ± 2.89 | 3.83 ± 3.87 | <0.001 |
| BCLC Stage |  |  | 0.190 |
| B | 11 (28.9) | 16 (15.8) |  |
| C | 27 (71.1) | 85 (84.2) |  |
| Extrahepatic metastasis | 21 (55.3) | 48 (47.5) | 0.781 |
| PVTT |  |  | 0.050 |
| None | 27 (71.1) | 50 (49.5) |  |
| Vp3 | 4 (10.5) | 23 (22.8) |  |
| Vp4 | 7 (18.4) | 19 (18.8) |  |
| AFP (ng/mL) |  |  | 0.043 |
| <7 | 18 (47.4) | 24 (23.8) |  |
| 7-1,000 | 11 (28.9) | 33 (32.7) |  |
| 1,000-10,000 | 4 (10.5) | 22 (21.8) |  |
| >10,000 | 5 (13.2) | 22 (21.8) |  |
| Concomitant treatment | 10 (26.3) | 25 (24.8) | 0.850 |

Values are presented as mean±standard deviation or number (%) unless otherwise indicated.

HCC, hepatocellular carcinoma; BCLC, Barcelona Clinic Liver Cancer; PVTT, portal vein tumor thrombosis; Vp3, right/ left portal vein; Vp4, main trunk; AFP, alpha-fetoprotein.

* Quantative variables by 2-sample t-test, qualitative variables by chi-square test.

**Supplementary Table 3. Clinical characteristics of patients stratified by Child Pugh score**

|  | Child Pugh A (n=1,217) | Child Pugh B (n=349) | P Value * |
| --- | --- | --- | --- |
| Maximum diameter  (cm) | 4.61 ± 4.39 | 6.33 ± 4.72 | <0.001 |
| Number of HCC  nodules | 3.62 ± 3.58 | 3.95 ± 3.76 | 0.144 |
| BCLC Stage |  |  | 0.010 |
| B | 269 (22.1) | 55 (15.8) |  |
| C | 948 (77.9) | 294 (84.2) |  |
| Extrahepatic metastasis | 704 (57.8) | 192 (55.0) | 0.346 |
| PVTT |  |  | <0.001 |
| None | 817 (67.1) | 158 (45.3) |  |
| Vp3 | 138 (11.3) | 67 (19.2) |  |
| Vp4 | 156 (12.8) | 90 (25.8) |  |
| AFP (ng/mL) |  |  | <0.001 |
| <7 | 367 (30.2) | 86 (24.6) |  |
| 7-1000 | 456 (37.6) | 103 (29.5) |  |
| 1000-10000 | 204 (16.8) | 92 (26.4) |  |
| >10000 | 188 (15.4) | 68 (19.5) |  |
| Concomitant treatment | 177 (14.5) | 51 (16.6) | 0.974 |

Values are presented as mean±standard deviation or number (%) unless otherwise indicated.

HCC, hepatocellular carcinoma; BCLC, Barcelona Clinic Liver Cancer; PVTT, portal vein tumor thrombosis; Vp3, right/ left portal vein; Vp4, main trunk; AFP, alpha-fetoprotein.

* Quantative variables by 2-sample t-test, qualitative variables by chi-square test.

**Supplementary Table 4. Clinical characteristics of patients stratified by initial AFP**

|  | Initial AFP ≤ 1,000 (n=1014) | Initial AFP > 1,000 (n=552) | P Value * |
| --- | --- | --- | --- |
| Child Pugh score |  |  | <0.001 |
| A | 825 (81.4) | 392 (71.0) |  |
| B | 189 (18.6) | 160 (29.0) |  |
| Maximum diameter  (cm) | 4.24 ± 4.02 | 6.37 ± 5.04 | <0.001 |
| Number of HCC  nodules | 3.59 ± 3.60 | 3.89 ± 3.65 | 0.115 |
| BCLC Stage |  |  | <0.001 |
| B | 253 (25.0) | 71 (12.9) |  |
| C | 761 (75.0) | 481 (87.1) |  |
| Extrahepatic metastasis | 569 (56.1) | 327 (59.2) | 0.232 |
| PVTT |  |  | <0.001 |
| None | 267 (48.4) | 708 (69.8) |  |
| Vp3 | 111 (10.9) | 94 (17.0) |  |
| Vp4 | 115 (11.3) | 131 (23.7) |  |
| Concomitant treatment | 145 (14.3) | 83 (15.0) | 0.693 |

Values are presented as mean±standard deviation or number (%) unless otherwise indicated.

HCC, hepatocellular carcinoma; BCLC, Barcelona Clinic Liver Cancer; PVTT, portal vein tumor thrombosis; Vp3, right/ left portal vein; Vp4, main trunk; AFP, alpha-fetoprotein.

* Quantative variables by 2-sample t-test, qualitative variables by chi-square test.

**Supplementary Table 5. Clinical characteristics of patients stratified by AFP response at first evaluation**

|  | Ratio of AFP < 80 % (n=395) | Ratio of AFP 80 – 120 % (n=311) | Ratio of AFP > 120 % (n=704) | P Value * |
| --- | --- | --- | --- | --- |
| Child Pugh score |  |  |  | 0.735 |
| A | 308 (78.0) | 250 (80.4) | 555 (78.8) |  |
| B | 87 (22.0) | 61 (19.6) | 149 (21.2) |  |
| Maximum diameter  (cm) | 5.16 ± 4.63 | 5.21 ± 4.71 | 4.66 ± 4.34 | 0.098 |
| Number of HCC  nodules | 3.54 ± 3.62 | 4.11 ± 3.75 | 3.62 ± 3.58 | 0.089 |
| BCLC Stage |  |  |  | 0.707 |
| B | 82 (20.8) | 61 (19.6) | 154 (21.9) |  |
| C | 313 (79.2) | 250 (80.4) | 550 (78.1) |  |
| Extrahepatic metastasis | 195 (49.4) | 183 (58.8) | 426 (60.5) | <0.001 |
| PVTT |  |  |  | 0.348 |
| None | 231 (58.5) | 202 (65.0) | 459 (65.2) |  |
| Vp3 | 56 (14.2) | 40 (12.9) | 83 (11.8) |  |
| Vp4 | 73 (18.5) | 44 (14.1) | 100 (14.2) |  |
| Concomitant treatment | 97 (24.6) | 43 (13.8) | 76(10.8) | <0.001 |

Values are presented as mean±standard deviation or number (%) unless otherwise indicated.

HCC, hepatocellular carcinoma; BCLC, Barcelona Clinic Liver Cancer; PVTT, portal vein tumor thrombosis; Vp3, right/ left portal vein; Vp4, main trunk; AFP, alpha-fetoprotein.

* Quantative variables by ANOVA test, qualitative variables by chi-square test.

**Supplementary Table 6. Clinical characteristics of patients with concomitant treatment.**

|  | With concomitant Tx (N=228) | Without concomitant Tx (N=1,338) | P Value * |
| --- | --- | --- | --- |
| Child Pugh score |  |  | 0.974 |
| A | 177 (77.6) | 1040 (77.7) |  |
| B | 51 (22.4) | 298 (22.3) |  |
| Maximum diameter  (cm) | 5.11 ± 4.43 | 6.33 ± 4.62 | 0.135 |
| Number of HCC  nodules | 2.45 ± 2.73 | 3.83 ± 3.87 | 0.017 |
| BCLC Stage |  |  | 0.493 |
| B | 52 (22.8) | 272 (20.3) |  |
| C | 175 (76.8) | 1052 (78.6) |  |
| Extrahepatic metastasis | 125 (54.8) | 771 (57.6) | 0.430 |
| PVTT |  |  | 0.928 |
| None | 143 (62.7) | 832 (62.2) |  |
| Vp3 | 32 (14.0) | 173 (12.9) |  |
| Vp4 | 33 (14.5) | 213 (15.9) |  |
| AFP (ng/mL) |  |  | 0.826 |
| <7 | 64 (28.1) | 389 (29.1) |  |
| 7-1000 | 81 (35.5) | 480 (35.9) |  |
| 1000-10000 | 41 (18.0) | 255 (19.1) |  |
| >10000 | 42 (18.4) | 214 (16.0) |  |

Values are presented as mean±standard deviation or number (%) unless otherwise indicated.

HCC, hepatocellular carcinoma; BCLC, Barcelona Clinic Liver Cancer; PVTT, portal vein tumor thrombosis; Vp3, right/ left portal vein; Vp4, main trunk; AFP, alpha-fetoprotein.

* Quantative variables by 2-sample t-test, qualitative variables by chi-square test.

**Supplementary Table 7. Prognostic factors of overall survival.**

| Variable | Univariate  HR (95% CI) | P Value * | Multivariate  HR (95% CI) | P Value * |
| --- | --- | --- | --- | --- |
| Age | 0.996 (0.991-1.001) | 0095 |  |  |
| Sex |  |  |  |  |
| Female | 0.951 (0.824-1.097) | 0.487 |  |  |
| BMI |  | 0.003 |  | 0.147 |
| <23 | 1 |  |  |  |
| 23-25 | 0.844 (0.738-0.966) |  |  |  |
| >25 | 0.822 (0.720-0.939) |  |  |  |
| ECOG performance |  | <0.001 |  | <0.001 |
| 0 | 1 |  | 1 |  |
| 1 | 1.164 (1.064-1.302) |  | 1.159 (1.032-1.302) |  |
| 2-4 | 2.312 (1.830-2.921) |  | 2.040 (1.608-2.589) |  |
| Child Pugh score |  | <0.001 |  | <0.001 |
| A | 1 |  | 1 |  |
| B | 1.796 (1.586-2.033) |  | 1.549 (1.355-1.772) |  |
| Extrahepatic metastasis | 1.161 (1.044-1.292) | 0.006 | 1.323 (1.177-1.486) | <0.001 |
| PVTT |  | <0.001 |  | <0.001 |
| None | 1 |  | 1 |  |
| Vp1-2 | 1.588 (1.315-1.918) |  | 1.420 (1.163-1.733) |  |
| Vp3 | 1.750 (1.495-2.048) |  | 1.680 (1.419-1.988) |  |
| Vp4 | 1.767 (1.527-2.046) |  | 1.323 (1.177-1.486) |  |
| AFP (ng/mL) |  | <0.001 |  | <0.001 |
| <7 | 1 |  | 1 |  |
| 7-1000 | 1.418 (1.241-1.621) |  | 1.395 (1.212-1.606) |  |
| 1000-10000 | 1.882 (1.610-2.200) |  | 1.772 (1.502-2.091) |  |
| >10000 | 2.599 (2.203-3.066) |  | 2.227 (1.859-2.667) |  |
| Diabetes | 0.878 (0.744-1.037) | 0.125 |  |  |
| Metformin Use | 0.540 (0.394-0.740) | <0.001 | 0.524 (0.378-0.724) | <0.001 |
| Statin Use | 1.029 (0.821-1.290) | 0.804 |  |  |
| Adverse event Gr 2 | 1.030 (0.925-1.147) | 0.592 |  |  |
| Skin reaction Gr 2 | 0.814 (0.713-0.929) | 0.002 | 0.844 (0.734-0.971) | 0.017 |
| Diarrhea Gr 2 | 0.862 (0.719-1.032) | 0.106 |  |  |
| Concomittent Tx | 0.648 (0.557-0.754) | <0.001 | 0.606 (0.516-0.711) | <0.001 |

BMI, body mass index; ECOG, Eastern Cooperative Oncology Group; PVTT, portal vein tumor thrombosis; AFP, alpha-fetoprotein; Gr, grade.

* by cox proportional hazard regression
